# Supplementary material for: Prereferral rectal artesunate and referral completion among children with suspected severe malaria in the Democratic Republic of the Congo, Nigeria and Uganda
Source: PubMed Central journal article supplement — BMJ Glob Health. 2022 May 17;7(5):e008346. doi: 10.1136/bmjgh-2021-008346 (PMC9114942; doi:10.1136/bmjgh-2021-008346), 2022-05-17
Supplement: bmjgh-2021-008346supp001.pdf [file bmjgh-2021-008346supp001.pdf]

## Pre-referral rectal artesunate and referral completion among children with suspected severe malaria in the Democratic Republic of the Congo, Nigeria and Uganda

Nina C. Brunner<sup>1,2,\*</sup>, Elizabeth Omoluabi<sup>3</sup>, Phyllis Awor<sup>4</sup>, Jean Okitawutshu<sup>1,5</sup>, Antoinette Tshetu<sup>5</sup>, Aita Signorell<sup>1,2</sup>, Babatunde Akano<sup>3</sup>, Kazeem Ayodeji<sup>3</sup>, Charles Okon<sup>3</sup>, Ocheche Yusuf<sup>3</sup>, Proscovia Athieno<sup>4</sup>, Joseph Kimera<sup>4</sup>, Gloria Tumukunde<sup>4</sup>, Irene Angiro<sup>4</sup>, Jean-Claude Kalenga<sup>5</sup>, Giulia Delvento<sup>1,2</sup>, Tristan T. Lee<sup>1,2</sup>, Mark Lambiris<sup>1,2</sup>, Amanda Ross<sup>1,2</sup>, Nadja Cereghetti<sup>1,2</sup>, Theodoor Visser<sup>6</sup>, Harriet G. Napier<sup>6</sup>, Valentina Buj<sup>1,7</sup>, Christian Burri<sup>1,2</sup>, Christian Lengeler<sup>1,2</sup>, Manuel W. Hetzel<sup>1,2,\*</sup>

<sup>1</sup> Swiss Tropical and Public Health Institute, Basel, Switzerland

<sup>2</sup> University of Basel, Basel, Switzerland

<sup>3</sup> Akena Associates, Abuja, Nigeria

<sup>4</sup> Makerere University School of Public Health, Kampala, Uganda

<sup>5</sup> Kinshasa School of Public Health, Kinshasa, Democratic Republic of the Congo

<sup>6</sup> Clinton Health Access Initiative, Boston, MA, USA

<sup>7</sup> UNICEF, New York, NY, USA

\* Corresponding authors: [nina.brunner@swisstph.ch](mailto:nina.brunner@swisstph.ch), [manuel.hetzel@swisstph.ch](mailto:manuel.hetzel@swisstph.ch)

### Supplementary material

## Supplement 1

## Inclusion flow-charts

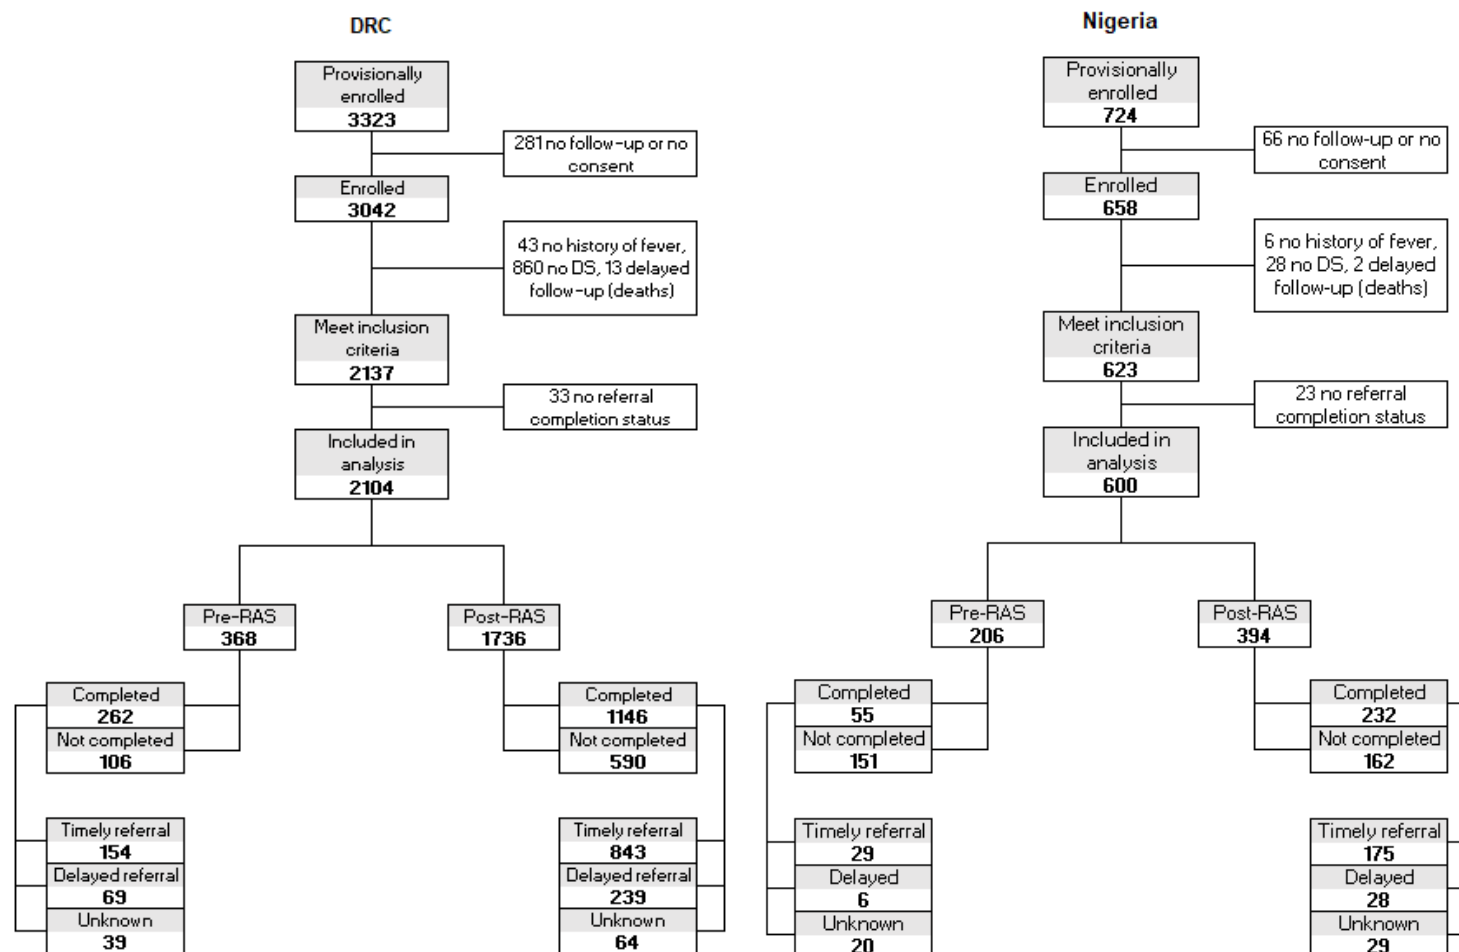

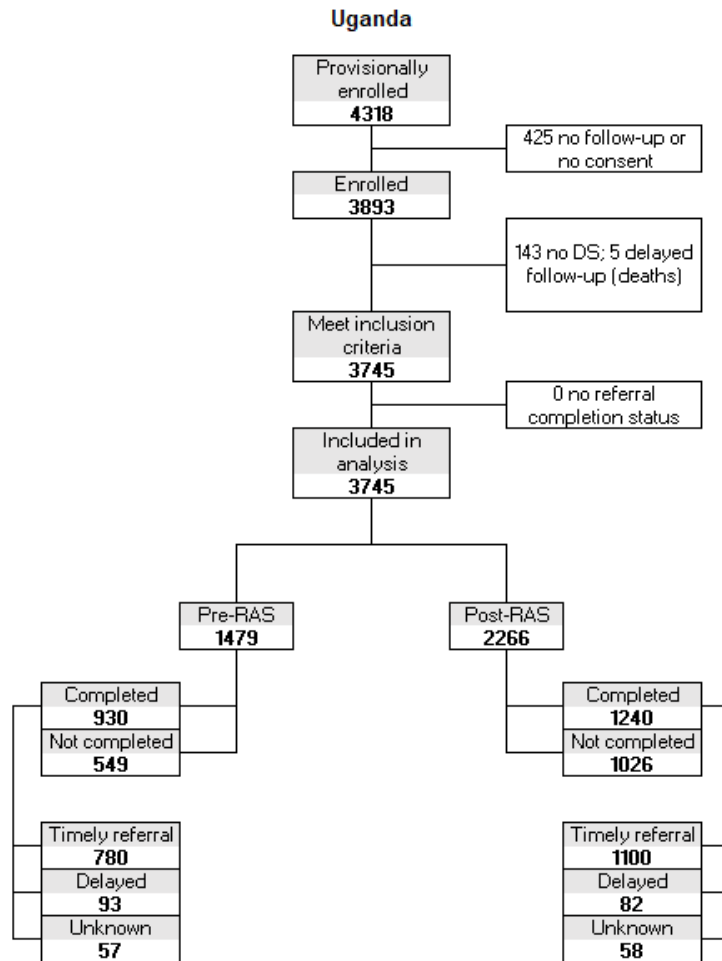

## Supplement 2

Table S2 1. Estimated associations between child characteristics and referral completion, DRC.

|                           | n            | N            | %           | DRC           |            |         |             |            |         |
|---------------------------|--------------|--------------|-------------|---------------|------------|---------|-------------|------------|---------|
|                           |              |              |             | Unadjusted OR | 95% CI     | p-value | Adjusted OR | 95% CI     | p-value |
| <b>All</b>                | <b>1,408</b> | <b>2,104</b> | <b>66.9</b> |               |            |         |             |            |         |
| <b>Study group</b>        |              |              |             |               |            |         |             |            |         |
| Pre-RAS                   | 262          | 368          | 71.2        | Ref.          |            |         | Ref.        |            |         |
| Post-RAS                  |              |              |             |               |            |         |             |            |         |
| No RAS use                | 142          | 188          | 75.5        | 0.42          | 0.23–0.77  | 0.005   | 0.34        | 0.18–0.66  | 0.001   |
| RAS use                   | 1,004        | 1,548        | 64.9        | 0.54          | 0.36–0.82  | 0.004   | 0.48        | 0.30–0.77  | 0.002   |
| <b>Child gender</b>       |              |              |             |               |            |         |             |            |         |
| Male                      | 735          | 1,121        | 65.6        | Ref.          |            |         | Ref.        |            |         |
| Female                    | 673          | 983          | 68.5        | 0.97          | 0.74–1.28  | 0.85    | 1.01        | 0.75–1.34  | 0.97    |
| <b>Age</b>                |              |              |             |               |            |         |             |            |         |
| 0                         | 312          | 416          | 75.0        | Ref.          |            |         | Ref.        |            |         |
| 1                         | 441          | 624          | 70.7        | 0.72          | 0.48–1.08  | 0.11    | 0.78        | 0.51–1.19  | 0.25    |
| 2                         | 303          | 467          | 64.9        | 0.74          | 0.49–1.14  | 0.18    | 0.77        | 0.49–1.20  | 0.24    |
| 3                         | 187          | 308          | 60.7        | 0.62          | 0.39–1.01  | 0.05    | 0.69        | 0.42–1.14  | 0.15    |
| 4                         | 165          | 289          | 57.1        | 0.56          | 0.34–0.91  | 0.02    | 0.53        | 0.31–0.88  | 0.02    |
| <b>Caregiver age</b>      |              |              |             |               |            |         |             |            |         |
| <25                       | 176          | 243          | 72.4        | Ref.          |            |         | Ref.        |            |         |
| 25–34                     | 530          | 765          | 69.3        | 1.19          | 0.74–1.93  | 0.47    | 1.32        | 0.79–2.19  | 0.29    |
| 35–44                     | 495          | 791          | 62.6        | 1.39          | 0.84–2.28  | 0.20    | 1.62        | 0.94–2.78  | 0.08    |
| >=45                      | 207          | 305          | 67.9        | 1.28          | 0.73–2.27  | 0.39    | 1.38        | 0.74–2.57  | 0.31    |
| Missing                   | 0            | 0            | NA          | NA            |            |         | NA          |            |         |
| <b>Caregiver gender</b>   |              |              |             |               |            |         |             |            |         |
| Male                      | 789          | 1,265        | 62.4        | Ref.          |            |         | Ref.        |            |         |
| Female                    | 619          | 839          | 73.8        | 1.10          | 0.81–1.49  | 0.54    | 1.19        | 0.85–1.67  | 0.31    |
| <b>Health zone</b>        |              |              |             |               |            |         |             |            |         |
| Ipamu                     | 562          | 692          | 81.2        | Ref.          |            |         | Ref.        |            |         |
| Kenge                     | 488          | 766          | 63.7        | 0.10          | 0.03–0.30  | <0.001  | 0.16        | 0.05–0.49  | 0.001   |
| Kingandu                  | 358          | 646          | 55.4        | 0.51          | 0.17–1.54  | 0.23    | 0.64        | 0.21–1.98  | 0.44    |
| <b>CNS involvement*</b>   |              |              |             |               |            |         |             |            |         |
| No                        | 532          | 678          | 78.5        | Ref.          |            |         | Ref.        |            |         |
| Yes                       | 876          | 1,426        | 61.4        | 0.60          | 0.43–0.83  | 0.002   | 0.58        | 0.41–0.82  | 0.002   |
| <b>Malaria test</b>       |              |              |             |               |            |         |             |            |         |
| Negative / Not done       | 64           | 100          | 64.0        | Ref.          |            |         | Ref.        |            |         |
| Positive                  | 1,344        | 2,004        | 67.1        | 1.46          | 0.77–2.74  | 0.24    | 4.02        | 1.87–8.60  | <0.001  |
| <b>Enrolment location</b> |              |              |             |               |            |         |             |            |         |
| CHW                       | 42           | 96           | 43.8        | Ref.          |            |         | Ref.        |            |         |
| PHC                       | 1,366        | 2,008        | 68.0        | 6.09          | 1.51–24.57 | 0.01    | 4.85        | 1.22–19.25 | 0.02    |

|                                          |       |       |      |       |             |        |  |       |             |       |
|------------------------------------------|-------|-------|------|-------|-------------|--------|--|-------|-------------|-------|
| <b>Enrolled during rainy season**</b>    |       |       |      |       |             |        |  |       |             |       |
| No                                       | 665   | 959   | 69.3 | Ref.  |             |        |  | Ref.  |             |       |
| Yes                                      | 743   | 1,145 | 64.9 | 0.97  | 0.73–1.28   | 0.82   |  | 0.77  | 0.56–1.07   | 0.12  |
| <b>Enrolled on a workday</b>             |       |       |      |       |             |        |  |       |             |       |
| No                                       | 365   | 527   | 69.3 | Ref.  |             |        |  | Ref.  |             |       |
| Yes                                      | 1,043 | 1,577 | 66.1 | 0.93  | 0.67–1.28   | 0.65   |  | 0.91  | 0.65–1.29   | 0.60  |
| <b>Enrolled during Covid-19 pandemic</b> |       |       |      |       |             |        |  |       |             |       |
| No                                       | 1,092 | 1,638 | 66.7 | Ref.  |             |        |  | Ref.  |             |       |
| Yes                                      | 316   | 466   | 67.8 | 1.12  | 0.80–1.58   | 0.50   |  | 1.15  | 0.78–1.70   | 0.48  |
| <b>Delay to enrolling provider</b>       |       |       |      |       |             |        |  |       |             |       |
| 0–1 days                                 | 402   | 667   | 60.3 | Ref.  |             |        |  | Ref.  |             |       |
| > 1 day                                  | 915   | 1,336 | 68.5 | 1.33  | 0.98–1.79   | 0.06   |  | 1.07  | 0.77–1.49   | 0.69  |
| Missing                                  | 91    | 101   | 90.1 | 7.87  | 3.08–20.10  | <0.001 |  | 3.33  | 0.86–12.83  | 0.08  |
| <b>Transport to enrolling provider</b>   |       |       |      |       |             |        |  |       |             |       |
| By foot / at home                        | 1,065 | 1,691 | 63.0 | Ref.  |             |        |  | Ref.  |             |       |
| Vehicle                                  | 251   | 307   | 81.8 | 1.05  | 0.65–1.70   | 0.85   |  | 1.08  | 0.66–1.79   | 0.75  |
| Missing                                  | 92    | 106   | 86.8 | 6.90  | 2.99–15.89  | <0.001 |  | 4.80  | 1.37–16.84  | 0.01  |
| <b>Time to RHF (min)</b>                 |       |       |      |       |             |        |  |       |             |       |
| 0–<15                                    | 668   | 806   | 82.9 | Ref.  |             |        |  | Ref.  |             |       |
| 15–<30                                   | 232   | 322   | 72.0 | 1.01  | 0.60–1.71   | 0.98   |  | 1.12  | 0.65–1.95   | 0.68  |
| 30–<60                                   | 228   | 336   | 67.9 | 0.85  | 0.50–1.43   | 0.54   |  | 0.80  | 0.46–1.40   | 0.44  |
| ≥60                                      | 80    | 228   | 35.1 | 0.55  | 0.29–1.03   | 0.06   |  | 0.46  | 0.24–0.89   | 0.02  |
| Missing                                  | 200   | 412   | 48.5 | 0.75  | 0.46–1.23   | 0.26   |  | 0.87  | 0.52–1.46   | 0.60  |
| <b>Perceived severity</b>                |       |       |      |       |             |        |  |       |             |       |
| Not fatal                                | 979   | 1,542 | 63.5 | Ref.  |             |        |  | Ref.  |             |       |
| Fatal                                    | 413   | 545   | 75.8 | 1.57  | 1.10–2.25   | 0.01   |  | 1.86  | 1.28–2.71   | 0.001 |
| Missing                                  | 16    | 17    | 94.1 | 33.29 | 1.39–795.57 | 0.03   |  | 16.14 | 0.61–429.60 | 0.10  |
| <b>Home treatment</b>                    |       |       |      |       |             |        |  |       |             |       |
| No                                       | 445   | 793   | 56.1 | Ref.  |             |        |  | Ref.  |             |       |
| Yes                                      | 963   | 1,311 | 73.5 | 1.51  | 1.12–2.03   | 0.01   |  | 1.43  | 1.03–1.99   | 0.03  |
| Missing                                  | 0     | 0     | NA   | NA    |             |        |  | NA    |             |       |

\* Danger signs involving the central nervous system (CNS): convulsions, unusually sleepy or unconscious

\*\* October-April

Table S2 2. Estimated associations between child characteristics and referral completion, Nigeria.

|                                       |            |            |             | Nigeria       |              |         |             |            |         |
|---------------------------------------|------------|------------|-------------|---------------|--------------|---------|-------------|------------|---------|
|                                       | n          | N          | %           | Unadjusted OR | 95% CI       | p-value | Adjusted OR | 95% CI     | p-value |
| <b>All</b>                            | <b>287</b> | <b>600</b> | <b>47.8</b> |               |              |         |             |            |         |
| <b>Study group</b>                    |            |            |             |               |              |         |             |            |         |
| Pre-RAS                               | 55         | 206        | 26.7        | Ref.          |              |         | NA          |            |         |
| Post-RAS                              |            |            |             |               |              |         |             |            |         |
| No RAS use                            | 118        | 183        | 64.5        | 5.95          | 2.54–13.93   | <0.001  | NA          |            |         |
| RAS use                               | 114        | 211        | 54.0        | 2.17          | 0.94–5.01    | 0.07    | NA          |            |         |
| <b>Child gender</b>                   |            |            |             |               |              |         |             |            |         |
| Male                                  | 177        | 364        | 48.6        | Ref.          |              |         | Ref.        |            |         |
| Female                                | 110        | 236        | 46.6        | 0.67          | 0.37–1.23    | 0.20    | 0.58        | 0.29–1.17  | 0.13    |
| <b>Age</b>                            |            |            |             |               |              |         |             |            |         |
| 0                                     | 28         | 71         | 39.4        | Ref.          |              |         | Ref.        |            |         |
| 1                                     | 85         | 163        | 52.1        | 1.51          | 0.51–4.47    | 0.46    | 1.88        | 0.57–6.29  | 0.30    |
| 2                                     | 86         | 170        | 50.6        | 1.07          | 0.37–3.10    | 0.90    | 1.23        | 0.38–3.92  | 0.73    |
| 3                                     | 50         | 119        | 42.0        | 0.63          | 0.21–1.92    | 0.42    | 0.74        | 0.21–2.59  | 0.64    |
| 4                                     | 38         | 77         | 49.4        | 1.57          | 0.45–5.45    | 0.47    | 1.96        | 0.50–7.64  | 0.33    |
| <b>Caregiver age</b>                  |            |            |             |               |              |         |             |            |         |
| <25                                   | 52         | 93         | 55.9        | Ref.          |              |         | Ref.        |            |         |
| 25–34                                 | 140        | 300        | 46.7        | 0.53          | 0.21–1.34    | 0.18    | 0.55        | 0.19–1.59  | 0.27    |
| 35–44                                 | 68         | 149        | 45.6        | 0.43          | 0.16–1.18    | 0.10    | 0.53        | 0.16–1.75  | 0.30    |
| >=45                                  | 26         | 57         | 45.6        | 0.39          | 0.11–1.37    | 0.14    | 0.58        | 0.14–2.50  | 0.47    |
| Missing                               | 1          | 1          | 100.0       | NA            |              |         | NA          |            |         |
| <b>Caregiver gender</b>               |            |            |             |               |              |         |             |            |         |
| Male                                  | 96         | 201        | 47.8        | Ref.          |              |         | Ref.        |            |         |
| Female                                | 191        | 399        | 47.9        | 1.88          | 1.00–3.54    | 0.05    | 1.35        | 0.61–3.00  | 0.46    |
| <b>LGA</b>                            |            |            |             |               |              |         |             |            |         |
| Mayo-Belwa                            | 160        | 251        | 63.7        | Ref.          |              |         |             |            |         |
| Fufore                                | 84         | 245        | 34.3        | 0.33          | 0.07–1.49    | 0.15    | NA          |            |         |
| Song                                  | 43         | 104        | 41.3        | 1.00          | 0.19–5.28    | 1.00    | NA          |            |         |
| <b>CNS involvement</b>                |            |            |             |               |              |         |             |            |         |
| No                                    | 33         | 99         | 33.3        | Ref.          |              |         | Ref.        |            |         |
| Yes                                   | 254        | 501        | 50.7        | 0.77          | 0.33–1.83    | 0.56    | 0.48        | 0.17–1.38  | 0.17    |
| <b>Malaria test</b>                   |            |            |             |               |              |         |             |            |         |
| Negative / Not done                   | 15         | 32         | 46.9        | Ref.          |              |         | Ref.        |            |         |
| Positive                              | 272        | 568        | 47.9        | 1.45          | 0.35–5.94    | 0.61    | 4.31        | 0.69–26.75 | 0.12    |
| <b>Enrolment location</b>             |            |            |             |               |              |         |             |            |         |
| CHW                                   | 49         | 315        | 15.6        | Ref.          |              |         | NA          |            |         |
| PHC                                   | 238        | 285        | 83.5        | 85.47         | 23.16–315.38 | <0.001  | NA          |            |         |
| <b>Enrolled during rainy season**</b> |            |            |             |               |              |         |             |            |         |
| No                                    | 78         | 154        | 50.6        | Ref.          |              |         | Ref.        |            |         |
| Yes                                   | 209        | 446        | 46.9        | 0.64          | 0.32–1.29    | 0.21    | 0.70        | 0.29–1.67  | 0.42    |

|                                                      |     |     |      |       |              |        |  |       |                    |
|------------------------------------------------------|-----|-----|------|-------|--------------|--------|--|-------|--------------------|
| <b>Enrolled on a workday</b>                         |     |     |      |       |              |        |  |       |                    |
| No                                                   | 33  | 107 | 30.8 | Ref.  |              |        |  | Ref.  |                    |
| Yes                                                  | 254 | 493 | 51.5 | 1.48  | 0.67–3.27    | 0.33   |  | 0.74  | 0.31–1.76 0.50     |
| <b>Enrolled during Covid-19 pandemic</b>             |     |     |      |       |              |        |  |       |                    |
| No                                                   | 239 | 483 | 49.5 | Ref.  |              |        |  | Ref.  |                    |
| Yes                                                  | 48  | 117 | 41.0 | 0.19  | 0.08–0.42    | <0.001 |  | 0.09  | 0.03–0.26 <0.001   |
| <b>Delay to enrolling provider</b>                   |     |     |      |       |              |        |  |       |                    |
| 0–1 days                                             | 90  | 197 | 45.7 | Ref.  |              |        |  | Ref.  |                    |
| > 1 day                                              | 154 | 327 | 47.1 | 1.35  | 0.71–2.58    | 0.36   |  | 1.64  | 0.77–3.52 0.20     |
| Missing                                              | 43  | 76  | 56.6 | 2.27  | 0.80–6.44    | 0.12   |  | 3.53  | 1.03–12.09 0.04    |
| <b>Transport to enrolling provider</b>               |     |     |      |       |              |        |  |       |                    |
| No vehicle / missing                                 | 125 | 371 | 33.7 | Ref.  |              |        |  | Ref.  |                    |
| Vehicle                                              | 162 | 229 | 70.7 | 1.28  | 0.60–2.69    | 0.52   |  | 0.82  | 0.32–2.10 0.68     |
| <b>Time to RHF (min)</b>                             |     |     |      |       |              |        |  |       |                    |
| 0–<15                                                | 85  | 104 | 81.7 | Ref.  |              |        |  | Ref.  |                    |
| 15–<30                                               | 62  | 87  | 71.3 | 0.60  | 0.17–2.14    | 0.43   |  | 0.48  | 0.13–1.73 0.26     |
| 30–<60                                               | 83  | 149 | 55.7 | 0.39  | 0.13–1.21    | 0.10   |  | 0.23  | 0.07–0.77 0.02     |
| > 60                                                 | 48  | 247 | 19.4 | 0.13  | 0.04–0.43    | <0.001 |  | 0.06  | 0.02–0.22 <0.001   |
| Missing                                              | 9   | 13  | 69.2 | 0.85  | 0.10–7.15    | 0.88   |  | 0.13  | 0.01–1.84 0.13     |
| <b>Perceived severity</b>                            |     |     |      |       |              |        |  |       |                    |
| Not fatal                                            | 212 | 434 | 48.8 | Ref.  |              |        |  | Ref.  |                    |
| Fatal                                                | 72  | 161 | 44.7 | 0.61  | 0.32–1.17    | 0.14   |  | 0.63  | 0.30–1.32 0.23     |
| Missing                                              | 3   | 5   | 60.0 | 1.25  | 0.05–32.21   | 0.89   |  | 1.23  | 0.01–153.00 0.93   |
| <b>Home treatment</b>                                |     |     |      |       |              |        |  |       |                    |
| No / missing                                         | 166 | 379 | 43.8 | Ref.  |              |        |  | Ref.  |                    |
| Yes                                                  | 121 | 221 | 54.8 | 1.14  | 0.63–2.06    | 0.68   |  | 1.08  | 0.54–2.16 0.82     |
| <b>Interactions</b>                                  |     |     |      |       |              |        |  |       |                    |
| <b>Enrolment location (adjusted for study group)</b> |     |     |      |       |              |        |  |       |                    |
| CHW                                                  | 49  | 315 | 15.6 | Ref.  |              |        |  | Ref.  |                    |
| PHC                                                  | 238 | 285 | 83.5 | 92.82 | 18.92–455.42 | <0.001 |  | 19.79 | 2.97–131.71 0.002  |
| <b>Study group by enrolment location</b>             |     |     |      |       |              |        |  |       |                    |
| <b>CHW</b>                                           |     |     |      |       |              |        |  |       |                    |
| Pre-RAS                                              | 9   | 148 | 6    | Ref.  |              |        |  | Ref.  |                    |
| <b>Post-RAS</b>                                      |     |     |      |       |              |        |  |       |                    |
| No RAS use                                           | 16  | 76  | 21   | 3.14  | 1.03–9.60    | 0.04   |  | 3.97  | 1.07–14.75 0.04    |
| RAS use                                              | 24  | 91  | 26   | 5.33  | 1.75–16.20   | 0.003  |  | 9.95  | 2.71–36.58 <0.001  |
| <b>PHC</b>                                           |     |     |      |       |              |        |  |       |                    |
| Pre-RAS                                              | 46  | 58  | 79   | Ref.  |              |        |  | Ref.  |                    |
| <b>Post-RAS</b>                                      |     |     |      |       |              |        |  |       |                    |
| No RAS use                                           | 102 | 107 | 95   | 13.00 | 3.11–54.42   | <0.001 |  | 35.09 | 6.52–188.75 <0.001 |
| RAS use                                              | 90  | 120 | 75   | 1.23  | 0.43–3.50    | 0.70   |  | 6.45  | 1.62–25.67 0.01    |

| Enrolment location by LGA |     |     |      |       |             |        |      |            |       |
|---------------------------|-----|-----|------|-------|-------------|--------|------|------------|-------|
| Mayo-Belwa - CHW          | 26  | 95  | 27.4 | Ref.  |             |        | Ref. |            |       |
| Mayo-Belwa - PHC          | 134 | 156 | 85.9 | 16.62 | 3.50–78.93  | <0.001 | NA   |            |       |
| Fufore - CHW              | 5   | 145 | 3.4  | 0.04  | 0.01–0.25   | <0.001 | 0.07 | 0.01–0.43  | 0.004 |
| Fufore - PHC              | 79  | 100 | 79.0 | 32.81 | 5.27–204.46 | <0.001 | 1.98 | 0.33–11.99 | 0.46  |
| Song - CHW                | 18  | 75  | 24.0 | 0.62  | 0.15–2.58   | 0.51   | 0.50 | 0.12–2.07  | 0.34  |
| Song - PHC                | 25  | 29  | 86.2 | 39.60 | 4.61–340.41 | <0.001 | 3.20 | 0.33–30.93 | 0.32  |

\* Danger signs involving the central nervous system (CNS): convulsions, unusually sleepy or unconscious

\*\* Mai-October



Table S2 3. Estimated associations between child characteristics and referral completion, Uganda.

|                                       |              |              |             | Uganda        |           |         |             |           |         |
|---------------------------------------|--------------|--------------|-------------|---------------|-----------|---------|-------------|-----------|---------|
|                                       | n            | N            | %           | Unadjusted OR | 95% CI    | p-value | Adjusted OR | 95% CI    | p-value |
| <b>All</b>                            | <b>2,170</b> | <b>3,745</b> | <b>57.9</b> |               |           |         |             |           |         |
| <b>Study group</b>                    |              |              |             |               |           |         |             |           |         |
| Pre-RAS                               | 930          | 1,479        | 62.9        | Ref.          |           |         | Ref.        |           |         |
| Post-RAS                              |              |              |             |               |           |         |             |           |         |
| No RAS use                            | 365          | 635          | 57.5        | 0.79          | 0.63–1.00 | 0.05    | 0.80        | 0.63–1.01 | 0.06    |
| RAS use                               | 875          | 1,631        | 53.6        | 0.64          | 0.53–0.77 | <0.001  | 0.72        | 0.58–0.88 | 0.002   |
| <b>Child gender</b>                   |              |              |             |               |           |         |             |           |         |
| Male                                  | 1,162        | 1,993        | 58.3        | Ref.          |           |         | Ref.        |           |         |
| Female                                | 1,008        | 1,752        | 57.5        | 0.97          | 0.83–1.12 | 0.66    | 0.98        | 0.84–1.14 | 0.81    |
| <b>Age</b>                            |              |              |             |               |           |         |             |           |         |
| 0                                     | 417          | 675          | 61.8        | Ref.          |           |         | Ref.        |           |         |
| 1                                     | 637          | 1,078        | 59.1        | 0.92          | 0.74–1.15 | 0.48    | 0.93        | 0.74–1.17 | 0.54    |
| 2                                     | 500          | 890          | 56.2        | 0.74          | 0.59–0.93 | 0.01    | 0.74        | 0.58–0.94 | 0.01    |
| 3                                     | 401          | 694          | 57.8        | 0.84          | 0.65–1.07 | 0.15    | 0.83        | 0.65–1.07 | 0.16    |
| 4                                     | 215          | 408          | 52.7        | 0.69          | 0.52–0.92 | 0.01    | 0.69        | 0.51–0.92 | 0.01    |
| <b>Caregiver age</b>                  |              |              |             |               |           |         |             |           |         |
| <25                                   | 831          | 1,394        | 59.6        | Ref.          |           |         | Ref.        |           |         |
| 25–34                                 | 868          | 1,484        | 58.5        | 0.92          | 0.78–1.09 | 0.36    | 0.93        | 0.78–1.11 | 0.44    |
| 35–44                                 | 327          | 608          | 53.8        | 0.82          | 0.66–1.03 | 0.08    | 0.84        | 0.66–1.06 | 0.13    |
| >=45                                  | 143          | 258          | 55.4        | 0.87          | 0.64–1.18 | 0.37    | 0.91        | 0.66–1.25 | 0.55    |
| Missing                               | 1            | 1            | 100.0       | NA            |           |         | NA          |           |         |
| <b>Caregiver gender</b>               |              |              |             |               |           |         |             |           |         |
| Male                                  | 359          | 610          | 58.9        | Ref.          |           |         | Ref.        |           |         |
| Female                                | 1,811        | 3,135        | 57.8        | 0.96          | 0.78–1.18 | 0.70    | 0.92        | 0.74–1.14 | 0.46    |
| <b>Health zone</b>                    |              |              |             |               |           |         |             |           |         |
| Ipamu                                 | 1,071        | 1,749        | 61.2        | Ref.          |           |         | Ref.        |           |         |
| Kenge                                 | 525          | 991          | 53.0        | 0.74          | 0.44–1.26 | 0.27    | 0.88        | 0.52–1.49 | 0.64    |
| Kingandu                              | 574          | 1,005        | 57.1        | 1.25          | 0.70–2.25 | 0.46    | 1.46        | 0.80–2.63 | 0.21    |
| <b>CNS involvement</b>                |              |              |             |               |           |         |             |           |         |
| No                                    | 267          | 425          | 62.8        | Ref.          |           |         | Ref.        |           |         |
| Yes                                   | 1,903        | 3,320        | 57.3        | 0.67          | 0.53–0.86 | 0.002   | 0.80        | 0.61–1.04 | 0.09    |
| <b>Malaria test</b>                   |              |              |             |               |           |         |             |           |         |
| Negative / Not done                   | 40           | 59           | 67.8        | Ref.          |           |         | Ref.        |           |         |
| Positive                              | 2,130        | 3,686        | 57.8        | 0.81          | 0.43–1.49 | 0.49    | 0.90        | 0.48–1.67 | 0.74    |
| <b>Enrolment location</b>             |              |              |             |               |           |         |             |           |         |
| CHW                                   | 2,170        | 3,745        | 57.9        | NA            |           |         | NA          |           |         |
| PHC                                   | 0            | 0            | NA          | NA            |           |         | NA          |           |         |
| <b>Enrolled during rainy season**</b> |              |              |             |               |           |         |             |           |         |
| No                                    | 772          | 1,392        | 55.5        | Ref.          |           |         | Ref.        |           |         |
| Yes                                   | 1,398        | 2,353        | 59.4        | 1.15          | 0.99–1.35 | 0.07    | 1.15        | 0.97–1.38 | 0.11    |

|                                          |       |       |      |      |            |        |  |      |                 |
|------------------------------------------|-------|-------|------|------|------------|--------|--|------|-----------------|
| <b>Enrolled on a workday</b>             |       |       |      |      |            |        |  |      |                 |
| No                                       | 516   | 959   | 53.8 | Ref. |            |        |  | Ref. |                 |
| Yes                                      | 1,654 | 2,786 | 59.4 | 1.20 | 1.01–1.42  | 0.04   |  | 1.19 | 1.00–1.41 0.05  |
| <b>Enrolled during Covid-19 pandemic</b> |       |       |      |      |            |        |  |      |                 |
| No                                       | 1,922 | 3,323 | 57.8 | Ref. |            |        |  | Ref. |                 |
| Yes                                      | 248   | 422   | 58.8 | 0.87 | 0.68–1.11  | 0.25   |  | 0.90 | 0.69–1.19 0.48  |
| <b>Delay to enrolling provider</b>       |       |       |      |      |            |        |  |      |                 |
| 0–1 days                                 | 1,212 | 2,134 | 56.8 | Ref. |            |        |  | Ref. |                 |
| > 1 day                                  | 925   | 1,565 | 59.1 | 1.15 | 0.99–1.35  | 0.08   |  | 1.14 | 0.97–1.34 0.12  |
| Missing                                  | 33    | 46    | 71.7 | 1.87 | 0.89–3.94  | 0.10   |  | 1.11 | 0.43–2.86 0.83  |
| <b>Transport to enrolling provider</b>   |       |       |      |      |            |        |  |      |                 |
| By foot / at home                        | 2,002 | 3,462 | 57.8 | Ref. |            |        |  | Ref. |                 |
| Vehicle                                  | 150   | 260   | 57.7 | 1.09 | 0.81–1.45  | 0.57   |  | 1.06 | 0.78–1.42 0.72  |
| Missing                                  | 18    | 23    | 78.3 | 3.39 | 1.08–10.66 | 0.04   |  | 3.31 | 0.78–14.06 0.11 |
| <b>Time to RHF (min)</b>                 |       |       |      |      |            |        |  |      |                 |
| 0–<15                                    | 1,349 | 1,998 | 67.5 | Ref. |            |        |  | Ref. |                 |
| 15–<30                                   | 692   | 1,457 | 47.5 | 0.69 | 0.56–0.85  | <0.001 |  | 0.72 | 0.58–0.89 0.003 |
| 30–<60                                   | 115   | 270   | 42.6 | 0.54 | 0.38–0.77  | <0.001 |  | 0.55 | 0.39–0.79 0.001 |
| > 60                                     | 0     | 2     | 0.0  | NA   |            |        |  | NA   |                 |
| Missing                                  | 14    | 18    | 77.8 | 2.35 | 0.68–8.14  | 0.18   |  | 1.88 | 0.53–6.67 0.33  |
| <b>Perceived severity</b>                |       |       |      |      |            |        |  |      |                 |
| Not fatal                                | 1,180 | 2,078 | 56.8 | Ref. |            |        |  | Ref. |                 |
| Fatal                                    | 985   | 1,657 | 59.4 | 1.07 | 0.91–1.24  | 0.41   |  | 1.11 | 0.94–1.30 0.21  |
| Missing                                  | 5     | 10    | 50.0 | 0.78 | 0.20–3.15  | 0.73   |  | 0.80 | 0.20–3.19 0.75  |
| <b>Home treatment</b>                    |       |       |      |      |            |        |  |      |                 |
| No                                       | 1,876 | 3,271 | 57.4 | Ref. |            |        |  | Ref. |                 |
| Yes                                      | 294   | 474   | 62.0 | 1.18 | 0.94–1.49  | 0.15   |  | 1.10 | 0.87–1.39 0.41  |
| Missing                                  | 0     | 0     | NA   | NA   |            |        |  | NA   |                 |

\* Danger signs involving the central nervous system (CNS): convulsions, unusually sleepy or unconscious

\*\* April–October

## Supplement 3

Table S3 1. Estimated associations between child characteristics and referral timeliness, DRC.

|                           | n          | N            | %           | DRC            |           |         |             |           |         |
|---------------------------|------------|--------------|-------------|----------------|-----------|---------|-------------|-----------|---------|
|                           |            |              |             | Undadjusted OR | 95% CI    | p-value | Adjusted OR | 95% CI    | p-value |
| <b>All</b>                | <b>997</b> | <b>1,305</b> | <b>76.4</b> |                |           |         |             |           |         |
| <b>Study group</b>        |            |              |             |                |           |         |             |           |         |
| Pre-RAS                   | 154        | 223          | 69.1        | Ref.           |           |         | Ref.        |           |         |
| Post-RAS                  |            |              |             |                |           |         |             |           |         |
| No RAS use                | 89         | 128          | 69.5        | 1.01           | 0.61–1.69 | 0.96    | 0.92        | 0.52–1.62 | 0.77    |
| RAS use                   | 754        | 954          | 79.0        | 1.49           | 1.04–2.14 | 0.03    | 1.39        | 0.92–2.12 | 0.12    |
| <b>Child gender</b>       |            |              |             |                |           |         |             |           |         |
| Male                      | 513        | 680          | 75.4        | Ref.           |           |         | Ref.        |           |         |
| Female                    | 484        | 625          | 77.4        | 1.08           | 0.82–1.42 | 0.58    | 1.11        | 0.83–1.48 | 0.47    |
| <b>Age</b>                |            |              |             |                |           |         |             |           |         |
| 0                         | 207        | 285          | 72.6        | Ref.           |           |         | Ref.        |           |         |
| 1                         | 323        | 413          | 78.2        | 1.46           | 1.00–2.13 | 0.05    | 1.56        | 1.06–2.31 | 0.02    |
| 2                         | 214        | 283          | 75.6        | 1.29           | 0.86–1.95 | 0.21    | 1.26        | 0.83–1.92 | 0.28    |
| 3                         | 140        | 173          | 80.9        | 1.71           | 1.03–2.82 | 0.04    | 1.48        | 0.88–2.49 | 0.14    |
| 4                         | 113        | 151          | 74.8        | 1.09           | 0.66–1.82 | 0.73    | 1.07        | 0.63–1.81 | 0.80    |
| <b>Caregiver age</b>      |            |              |             |                |           |         |             |           |         |
| <25                       | 124        | 164          | 75.6        | Ref.           |           |         | Ref.        |           |         |
| 25–34                     | 377        | 500          | 75.4        | 0.96           | 0.62–1.50 | 0.87    | 0.85        | 0.53–1.35 | 0.49    |
| 35–44                     | 357        | 458          | 77.9        | 1.01           | 0.64–1.61 | 0.95    | 0.85        | 0.52–1.40 | 0.53    |
| >=45                      | 139        | 183          | 76.0        | 0.83           | 0.48–1.41 | 0.48    | 0.76        | 0.42–1.34 | 0.34    |
| Not documented            | 0          | 0            | NA          | NA             |           |         | NA          |           |         |
| <b>Caregiver gender</b>   |            |              |             |                |           |         |             |           |         |
| Male                      | 557        | 716          | 77.8        | Ref.           |           |         | Ref.        |           |         |
| Female                    | 440        | 589          | 74.7        | 0.86           | 0.63–1.16 | 0.31    | 0.78        | 0.56–1.09 | 0.15    |
| <b>Health zone</b>        |            |              |             |                |           |         |             |           |         |
| Ipamu                     | 418        | 514          | 81.3        | Ref.           |           |         | Ref.        |           |         |
| Kenge                     | 345        | 485          | 71.1        | 0.53           | 0.29–0.97 | 0.04    | 0.54        | 0.29–1.02 | 0.06    |
| Kingandu                  | 234        | 306          | 76.5        | 0.72           | 0.38–1.34 | 0.29    | 0.75        | 0.38–1.49 | 0.41    |
| <b>CNS involvement*</b>   |            |              |             |                |           |         |             |           |         |
| No                        | 358        | 493          | 72.6        | Ref.           |           |         | Ref.        |           |         |
| Yes                       | 639        | 812          | 78.7        | 1.55           | 1.16–2.07 | 0.003   | 1.50        | 1.10–2.04 | 0.01    |
| <b>Malaria test</b>       |            |              |             |                |           |         |             |           |         |
| Negative / Not done       | 38         | 47           | 80.9        | Ref.           |           |         | Ref.        |           |         |
| Positive                  | 959        | 1,258        | 76.2        | 0.71           | 0.31–1.63 | 0.41    | 0.39        | 0.13–1.21 | 0.10    |
| <b>Enrolment location</b> |            |              |             |                |           |         |             |           |         |
| CHW                       | 31         | 38           | 81.6        | Ref.           |           |         | Ref.        |           |         |
| PHC                       | 966        | 1,267        | 76.2        | 0.65           | 0.22–1.92 | 0.43    | 0.63        | 0.21–1.86 | 0.40    |

|                                          |     |       |      |      |            |        |      |            |        |  |
|------------------------------------------|-----|-------|------|------|------------|--------|------|------------|--------|--|
| <b>Enrolled during rainy season**</b>    |     |       |      |      |            |        |      |            |        |  |
| No                                       | 501 | 627   | 79.9 | Ref. |            |        |      | Ref.       |        |  |
| Yes                                      | 496 | 678   | 73.2 | 0.71 | 0.54–0.95  | 0.02   | 0.73 | 0.53–1.01  | 0.06   |  |
| <b>Enrolled on a workday</b>             |     |       |      |      |            |        |      |            |        |  |
| No                                       | 267 | 341   | 78.3 | Ref. |            |        | Ref. |            |        |  |
| Yes                                      | 730 | 964   | 75.7 | 0.83 | 0.61–1.15  | 0.26   | 0.83 | 0.59–1.15  | 0.25   |  |
| <b>Enrolled during Covid-19 pandemic</b> |     |       |      |      |            |        |      |            |        |  |
| No                                       | 764 | 1,005 | 76.0 | Ref. |            |        | Ref. |            |        |  |
| Yes                                      | 233 | 300   | 77.7 | 1.09 | 0.77–1.54  | 0.62   | 0.83 | 0.57–1.22  | 0.35   |  |
| <b>Delay to enrolling provider</b>       |     |       |      |      |            |        |      |            |        |  |
| 0–1 days                                 | 296 | 396   | 74.7 | Ref. |            |        | Ref. |            |        |  |
| > 1 day                                  | 671 | 873   | 76.9 | 1.19 | 0.87–1.61  | 0.27   | 1.69 | 1.20–2.38  | 0.003  |  |
| Not documented                           | 30  | 36    | 83.3 | 1.43 | 0.51–4.01  | 0.50   | 2.29 | 0.35–14.86 | 0.38   |  |
| <b>Transport to enrolling provider</b>   |     |       |      |      |            |        |      |            |        |  |
| By foot / at home                        | 786 | 1,024 | 76.8 | Ref. |            |        | Ref. |            |        |  |
| Vehicle                                  | 181 | 243   | 74.5 | 0.82 | 0.56–1.21  | 0.33   | 0.88 | 0.59–1.31  | 0.53   |  |
| Not documented                           | 30  | 38    | 78.9 | 0.93 | 0.37–2.34  | 0.88   | 0.37 | 0.07–1.97  | 0.25   |  |
| <b>Time to RHF (min)</b>                 |     |       |      |      |            |        |      |            |        |  |
| 0–<15                                    | 498 | 636   | 78.3 | Ref. |            |        | Ref. |            |        |  |
| 15–<30                                   | 157 | 213   | 73.7 | 0.95 | 0.59–1.53  | 0.84   | 0.98 | 0.59–1.61  | 0.92   |  |
| 30–<60                                   | 147 | 202   | 72.8 | 0.83 | 0.51–1.35  | 0.46   | 0.82 | 0.49–1.38  | 0.46   |  |
| ≥60                                      | 44  | 69    | 63.8 | 0.60 | 0.31–1.16  | 0.13   | 0.58 | 0.28–1.18  | 0.13   |  |
| Missing                                  | 151 | 185   | 81.6 | 1.32 | 0.80–2.17  | 0.28   | 1.25 | 0.72–2.15  | 0.43   |  |
| <b>Perceived severity</b>                |     |       |      |      |            |        |      |            |        |  |
| Not fatal                                | 690 | 907   | 76.1 | Ref. |            |        | Ref. |            |        |  |
| Fatal                                    | 294 | 384   | 76.6 | 0.91 | 0.67–1.26  | 0.59   | 0.92 | 0.66–1.28  | 0.61   |  |
| Not documented                           | 13  | 14    | 92.9 | 1.63 | 0.18–14.28 | 0.66   | 1.73 | 0.19–15.97 | 0.63   |  |
| <b>Home treatment</b>                    |     |       |      |      |            |        |      |            |        |  |
| No                                       | 339 | 406   | 83.5 | Ref. |            |        | Ref. |            |        |  |
| Yes                                      | 658 | 899   | 73.2 | 0.53 | 0.38–0.75  | <0.001 | 0.49 | 0.33–0.71  | <0.001 |  |
| Not documented                           | 0   | 0     | NA   | NA   |            |        | NA   |            |        |  |

\* Danger sign involving the central nervous system (CNS): convulsions, unusually sleepy or unconscious

\*\* October-April

Table S3 2. Estimated associations between child characteristics and referral timeliness, Nigeria.

|                                       |            |            |             | Nigeria        |            |         |             |            |         |
|---------------------------------------|------------|------------|-------------|----------------|------------|---------|-------------|------------|---------|
|                                       | n          | N          | %           | Undadjusted OR | 95% CI     | p-value | Adjusted OR | 95% CI     | p-value |
| <b>All</b>                            | <b>204</b> | <b>238</b> | <b>85.7</b> |                |            |         |             |            |         |
| <b>Study group</b>                    |            |            |             |                |            |         |             |            |         |
| Pre-RAS                               | 29         | 35         | 82.9        | Ref.           |            |         | Ref.        |            |         |
| Post-RAS                              |            |            |             |                |            |         |             |            |         |
| No RAS use                            | 84         | 101        | 83.2        | 1.02           | 0.37–2.84  | 0.97    | 1.33        | 0.36–4.85  | 0.67    |
| RAS use                               | 91         | 102        | 89.2        | 1.71           | 0.58–5.04  | 0.33    | 1.53        | 0.36–6.40  | 0.56    |
| <b>Child gender</b>                   |            |            |             |                |            |         |             |            |         |
| Male                                  | 114        | 140        | 81.4        | Ref.           |            |         | Ref.        |            |         |
| Female                                | 90         | 98         | 91.8        | 2.57           | 1.11–5.94  | 0.03    | 2.73        | 1.03–7.28  | 0.04    |
| <b>Age</b>                            |            |            |             |                |            |         |             |            |         |
| 0                                     | 21         | 24         | 87.5        | Ref.           |            |         | Ref.        |            |         |
| 1                                     | 58         | 70         | 82.9        | 0.69           | 0.18–2.69  | 0.59    | 0.48        | 0.09–2.67  | 0.40    |
| 2                                     | 64         | 73         | 87.7        | 1.02           | 0.25–4.11  | 0.98    | 0.68        | 0.13–3.65  | 0.65    |
| 3                                     | 35         | 39         | 89.7        | 1.25           | 0.25–6.14  | 0.78    | 0.83        | 0.12–5.87  | 0.86    |
| 4                                     | 26         | 32         | 81.3        | 0.62           | 0.14–2.78  | 0.53    | 0.54        | 0.08–3.54  | 0.52    |
| <b>Caregiver age</b>                  |            |            |             |                |            |         |             |            |         |
| <25                                   | 42         | 48         | 87.5        | Ref.           |            |         | Ref.        |            |         |
| 25–34                                 | 98         | 117        | 83.8        | 0.74           | 0.27–1.98  | 0.54    | 0.40        | 0.12–1.35  | 0.14    |
| 35–44                                 | 48         | 54         | 88.9        | 1.14           | 0.34–3.81  | 0.83    | 0.49        | 0.11–2.12  | 0.34    |
| >=45                                  | 16         | 19         | 84.2        | 0.76           | 0.17–3.42  | 0.72    | 0.25        | 0.04–1.69  | 0.15    |
| Not documented                        | 0          | 0          | NA          | NA             |            |         | NA          |            |         |
| <b>Caregiver gender</b>               |            |            |             |                |            |         |             |            |         |
| Male                                  | 63         | 69         | 91.3        | Ref.           |            |         | Ref.        |            |         |
| Female                                | 141        | 169        | 83.4        | 0.48           | 0.19–1.22  | 0.12    | 0.42        | 0.12–1.41  | 0.16    |
| <b>LGA</b>                            |            |            |             |                |            |         |             |            |         |
| Mayo-Belwa                            | 112        | 135        | 83.0        | Ref.           |            |         | Ref.        |            |         |
| Fufore                                | 56         | 65         | 86.2        | 1.31           | 0.48–3.56  | 0.60    | 0.84        | 0.30–2.40  | 0.75    |
| Song                                  | 36         | 38         | 94.7        | 3.78           | 0.78–18.32 | 0.10    | 5.42        | 1.02–28.68 | 0.05    |
| <b>CNS involvement</b>                |            |            |             |                |            |         |             |            |         |
| No                                    | 18         | 26         | 69.2        | Ref.           |            |         | Ref.        |            |         |
| Yes                                   | 186        | 212        | 87.7        | 3.18           | 1.26–8.05  | 0.01    | 4.78        | 1.28–17.77 | 0.02    |
| <b>Malaria test</b>                   |            |            |             |                |            |         |             |            |         |
| Negative / Not done                   | 9          | 10         | 90.0        | Ref.           |            |         | Ref.        |            |         |
| Positive                              | 195        | 228        | 85.5        | 0.66           | 0.08–5.35  | 0.69    | 1.58        | 0.15–16.73 | 0.71    |
| <b>Enrolment location</b>             |            |            |             |                |            |         |             |            |         |
| CHW                                   | 30         | 39         | 76.9        | Ref.           |            |         | Ref.        |            |         |
| PHC                                   | 174        | 199        | 87.4        | 2.09           | 0.89–4.91  | 0.09    | 1.73        | 0.45–6.60  | 0.42    |
| <b>Enrolled during rainy season**</b> |            |            |             |                |            |         |             |            |         |
| No                                    | 56         | 66         | 84.8        | Ref.           |            |         | Ref.        |            |         |
| Yes                                   | 148        | 172        | 86.0        | 1.10           | 0.50–2.45  | 0.81    | 0.59        | 0.20–1.74  | 0.34    |

|                                          |     |     |       |      |            |      |  |      |                |
|------------------------------------------|-----|-----|-------|------|------------|------|--|------|----------------|
| <b>Enrolled on a workday</b>             |     |     |       |      |            |      |  |      |                |
| No                                       | 24  | 27  | 88.9  | Ref. |            |      |  | Ref. |                |
| Yes                                      | 180 | 211 | 85.3  | 0.73 | 0.21–2.56  | 0.62 |  | 0.78 | 0.18–3.41 0.74 |
| <b>Enrolled during Covid-19 pandemic</b> |     |     |       |      |            |      |  |      |                |
| No                                       | 165 | 195 | 84.6  | Ref. |            |      |  | Ref. |                |
| Yes                                      | 39  | 43  | 90.7  | 1.77 | 0.59–5.33  | 0.31 |  | 1.90 | 0.49–7.44 0.35 |
| <b>Delay to enrolling provider</b>       |     |     |       |      |            |      |  |      |                |
| 0–1 days                                 | 77  | 89  | 86.5  | Ref. |            |      |  | Ref. |                |
| > 1 day                                  | 122 | 144 | 84.7  | 0.86 | 0.40–1.85  | 0.71 |  | 0.63 | 0.25–1.58 0.33 |
| Not documented                           | 5   | 5   | 100.0 | NA   |            |      |  | NA   |                |
| <b>Transport to enrolling provider</b>   |     |     |       |      |            |      |  |      |                |
| No vehicle                               | 70  | 84  | 83.3  | Ref. |            |      |  | Ref. |                |
| Vehicle                                  | 134 | 154 | 87.0  | 1.44 | 0.69–3.04  | 0.33 |  | 1.14 | 0.40–3.24 0.81 |
| Not documented                           | 5   | 5   | 100.0 | NA   |            |      |  | NA   |                |
| <b>Time to RHF (min)</b>                 |     |     |       |      |            |      |  |      |                |
| 0–<15                                    | 62  | 70  | 88.6  | Ref. |            |      |  | Ref. |                |
| 15–<30                                   | 46  | 48  | 95.8  | 2.97 | 0.60–14.64 | 0.18 |  | 1.72 | 0.31–9.69 0.54 |
| 30–<60                                   | 59  | 75  | 78.7  | 0.48 | 0.19–1.19  | 0.11 |  | 0.38 | 0.14–1.06 0.07 |
| > 60                                     | 34  | 41  | 82.9  | 0.63 | 0.21–1.88  | 0.40 |  | 0.75 | 0.20–2.83 0.67 |
| Missing                                  | 3   | 4   | 75.0  | 0.39 | 0.04–4.18  | 0.43 |  | 0.16 | 0.01–2.76 0.21 |
| <b>Perceived severity</b>                |     |     |       |      |            |      |  |      |                |
| Not fatal                                | 155 | 180 | 86.1  | Ref. |            |      |  | Ref. |                |
| Fatal                                    | 49  | 58  | 84.5  | 0.88 | 0.38–2.01  | 0.76 |  | 0.93 | 0.34–2.52 0.88 |
| Not documented                           | 0   | 0   | NA    | NA   |            |      |  | NA   |                |
| <b>Home treatment</b>                    |     |     |       |      |            |      |  |      |                |
| No                                       | 117 | 138 | 84.8  | Ref. |            |      |  | Ref. |                |
| Yes                                      | 87  | 100 | 87.0  | 1.20 | 0.57–2.53  | 0.63 |  | 1.02 | 0.42–2.49 0.96 |
| Not documented                           | 0   | 0   | NA    | NA   |            |      |  | NA   |                |

\* Danger sign involving the central nervous system (CNS): convulsions, unusually sleepy or unconscious

\*\* Mai–October

Table S3 3. Estimated associations between child characteristics and referral timeliness, Uganda.

|                                       |              |              |             | Uganda        |           |         |             |           |         |
|---------------------------------------|--------------|--------------|-------------|---------------|-----------|---------|-------------|-----------|---------|
|                                       | n            | N            | %           | Unadjusted OR | 95% CI    | p-value | Adjusted OR | 95% CI    | p-value |
| <b>All</b>                            | <b>1,880</b> | <b>2,055</b> | <b>91.5</b> |               |           |         |             |           |         |
| <b>Study group</b>                    |              |              |             |               |           |         |             |           |         |
| Pre-RAS                               | 780          | 873          | 89.3        | Ref.          |           |         | Ref.        |           |         |
| Post-RAS                              |              |              |             |               |           |         |             |           |         |
| No RAS use                            | 321          | 350          | 91.7        | 1.40          | 0.88–2.20 | 0.15    | 1.43        | 0.89–2.30 | 0.14    |
| RAS use                               | 779          | 832          | 93.6        | 1.91          | 1.31–2.79 | <0.001  | 1.81        | 1.17–2.79 | 0.01    |
| <b>Child gender</b>                   |              |              |             |               |           |         |             |           |         |
| Male                                  | 1,003        | 1,105        | 90.8        | Ref.          |           |         | Ref.        |           |         |
| Female                                | 877          | 950          | 92.3        | 1.23          | 0.89–1.69 | 0.21    | 1.23        | 0.89–1.71 | 0.21    |
| <b>Age</b>                            |              |              |             |               |           |         |             |           |         |
| 0                                     | 358          | 395          | 90.6        | Ref.          |           |         | Ref.        |           |         |
| 1                                     | 559          | 611          | 91.5        | 1.15          | 0.73–1.80 | 0.55    | 1.15        | 0.73–1.83 | 0.54    |
| 2                                     | 438          | 470          | 93.2        | 1.44          | 0.87–2.39 | 0.15    | 1.49        | 0.89–2.49 | 0.13    |
| 3                                     | 345          | 382          | 90.3        | 0.97          | 0.59–1.58 | 0.89    | 0.89        | 0.53–1.47 | 0.64    |
| 4                                     | 180          | 197          | 91.4        | 1.14          | 0.62–2.11 | 0.68    | 1.01        | 0.53–1.90 | 0.99    |
| <b>Caregiver age</b>                  |              |              |             |               |           |         |             |           |         |
| <25                                   | 713          | 791          | 90.1        | Ref.          |           |         | Ref.        |           |         |
| 25–34                                 | 752          | 818          | 91.9        | 1.25          | 0.88–1.77 | 0.22    | 1.33        | 0.92–1.91 | 0.13    |
| 35–44                                 | 289          | 309          | 93.5        | 1.60          | 0.95–2.69 | 0.08    | 1.81        | 1.04–3.13 | 0.03    |
| >=45                                  | 125          | 136          | 91.9        | 1.22          | 0.62–2.39 | 0.56    | 1.22        | 0.60–2.49 | 0.59    |
| Not documented                        | 1            | 1            | 100.0       | NA            |           |         | NA          |           |         |
| <b>Caregiver gender</b>               |              |              |             |               |           |         |             |           |         |
| Male                                  | 312          | 341          | 91.5        | Ref.          |           |         | Ref.        |           |         |
| Female                                | 1,568        | 1,714        | 91.5        | 1.03          | 0.67–1.58 | 0.89    | 1.21        | 0.77–1.92 | 0.41    |
| <b>Health zone</b>                    |              |              |             |               |           |         |             |           |         |
| Ipamu                                 | 928          | 1,017        | 91.2        | Ref.          |           |         | Ref.        |           |         |
| Kenge                                 | 451          | 507          | 89.0        | 0.86          | 0.55–1.34 | 0.49    | 0.65        | 0.41–1.03 | 0.07    |
| Kingandu                              | 501          | 531          | 94.4        | 1.74          | 1.04–2.92 | 0.03    | 1.19        | 0.67–2.12 | 0.56    |
| <b>CNS involvement</b>                |              |              |             |               |           |         |             |           |         |
| No                                    | 223          | 246          | 90.7        | Ref.          |           |         | Ref.        |           |         |
| Yes                                   | 1,657        | 1,809        | 91.6        | 1.21          | 0.74–1.96 | 0.45    | 1.13        | 0.66–1.92 | 0.65    |
| <b>Malaria test</b>                   |              |              |             |               |           |         |             |           |         |
| Negative / Not done                   | 35           | 39           | 89.7        | Ref.          |           |         | Ref.        |           |         |
| Positive                              | 1,845        | 2,016        | 91.5        | 1.18          | 0.40–3.44 | 0.77    | 0.94        | 0.31–2.81 | 0.91    |
| <b>Enrolment location</b>             |              |              |             |               |           |         |             |           |         |
| CHW                                   | 1,880        | 2,055        | 91.5        | NA            |           |         | NA          |           |         |
| PHC                                   | 0            | 0            | NA          | NA            |           |         | NA          |           |         |
| <b>Enrolled during rainy season**</b> |              |              |             |               |           |         |             |           |         |
| No                                    | 680          | 738          | 92.1        | Ref.          |           |         | Ref.        |           |         |
| Yes                                   | 1,200        | 1,317        | 91.1        | 0.92          | 0.65–1.28 | 0.61    | 0.97        | 0.67–1.40 | 0.87    |

|                                          |       |       |       |      |            |        |  |      |                  |
|------------------------------------------|-------|-------|-------|------|------------|--------|--|------|------------------|
| <b>Enrolled on a workday</b>             |       |       |       |      |            |        |  |      |                  |
| No                                       | 439   | 480   | 91.5  | Ref. |            |        |  | Ref. |                  |
| Yes                                      | 1,441 | 1,575 | 91.5  | 0.99 | 0.68–1.44  | 0.97   |  | 1.06 | 0.72–1.54 0.78   |
| <b>Enrolled during Covid-19 pandemic</b> |       |       |       |      |            |        |  |      |                  |
| No                                       | 1,659 | 1,817 | 91.3  | Ref. |            |        |  | Ref. |                  |
| Yes                                      | 221   | 238   | 92.9  | 1.27 | 0.74–2.17  | 0.39   |  | 0.97 | 0.53–1.78 0.93   |
| <b>Delay to enrolling provider</b>       |       |       |       |      |            |        |  |      |                  |
| 0–1 days                                 | 1,119 | 1,189 | 94.1  | Ref. |            |        |  | Ref. |                  |
| > 1 day                                  | 755   | 860   | 87.8  | 0.45 | 0.33–0.62  | <0.001 |  | 0.48 | 0.34–0.68 <0.001 |
| Not documented                           | 6     | 6     | 100.0 | NA   |            |        |  | NA   |                  |
| <b>Transport to enrolling provider</b>   |       |       |       |      |            |        |  |      |                  |
| By foot / at home                        | 1,745 | 1,912 | 91.3  | Ref. |            |        |  | Ref. |                  |
| Vehicle                                  | 135   | 143   | 94.4  | 1.56 | 0.74–3.26  | 0.24   |  | 1.70 | 0.80–3.60 0.17   |
| Not documented                           | 0     | 0     | NA    | NA   |            |        |  | NA   |                  |
| <b>Time to RHF (min)</b>                 |       |       |       |      |            |        |  |      |                  |
| 0–<15                                    | 1,168 | 1,277 | 91.5  | Ref. |            |        |  | Ref. |                  |
| 15–<30                                   | 605   | 657   | 92.1  | 1.21 | 0.82–1.81  | 0.34   |  | 1.10 | 0.75–1.63 0.61   |
| 30–<60                                   | 94    | 107   | 87.9  | 0.77 | 0.39–1.53  | 0.46   |  | 0.61 | 0.30–1.24 0.17   |
| > 60                                     | 0     | 0     | NA    | NA   |            |        |  | NA   |                  |
| Missing                                  | 13    | 14    | 92.9  | 1.30 | 0.16–10.55 | 0.81   |  | 1.25 | 0.14–10.82 0.84  |
| <b>Perceived severity</b>                |       |       |       |      |            |        |  |      |                  |
| Not fatal                                | 1,017 | 1,109 | 91.7  | Ref. |            |        |  | Ref. |                  |
| Fatal                                    | 859   | 942   | 91.2  | 0.96 | 0.70–1.33  | 0.82   |  | 0.94 | 0.67–1.31 0.70   |
| Not documented                           | 4     | 4     | 100.0 | NA   |            |        |  | NA   |                  |
| <b>Home treatment</b>                    |       |       |       |      |            |        |  |      |                  |
| No                                       | 1,635 | 1,774 | 92.2  | Ref. |            |        |  | Ref. |                  |
| Yes                                      | 245   | 281   | 87.2  | 0.59 | 0.40–0.89  | 0.01   |  | 0.69 | 0.45–1.04 0.08   |
| Not documented                           | 0     | 0     | NA    | NA   |            |        |  | NA   |                  |

\* Danger sign involving the central nervous system (CNS): convulsions, unusually sleepy or unconscious

\*\* April–October
